# Supplementary material
Source: publisher figshare collection journal article supplement (https://frontiersin.figshare.com/ndownloader/files/13139369)
Supplement: Supplementary file [file 13139369]

**Suppl. Table 2. Intertumor HLA-G expression in cancers**

| Cancer types  | Sample size | Methods (Ab)  | HLA-G (%) | Immuno-staining evaluation                                                                                         | Main conclusions of HLA-G expression                                        | Ref. |
|---------------|-------------|---------------|-----------|--------------------------------------------------------------------------------------------------------------------|-----------------------------------------------------------------------------|------|
| Breast cancer | 39          | IHC (4H84)    | 41%       | Negative (0), 1% ~ 5% (1), 6% ~ 25% (2), 26% ~ 75% (3), and 76% ~ 100% (4).                                        | Associated with shorter disease-free survival.                              | 85   |
|               | 58          | IHC (4H84)    | 70.7%     | Negative (0), 1% ~25% (1), 26% ~ 50% (2), 51% ~ 75% (3), and >75% (4).                                             | Associated with advanced disease stage.                                     | 86   |
|               | 235         | IHC (HGY)     | 66%       | Negative (-), < 25% (+) and/or weakly, 25% ~ 50% and/or moderately (++), and > 50% and/or strongly stained (+++) . | An independent prognosis factor.                                            | 87   |
|               | 501         | IHC (4H84)    | 60%       | Any staining of tumor cells as positive and no staining as negative.                                               | A prognostic factor among classical HLA class I negative patients,.         | 88   |
|               | 52          | IHC (5A6G7)   | 59.6%     | Negative (< 25% positivity) and positive (>25% positivity) .                                                       | Associated with aggressiveness.                                             | 89   |
|               | 45          | IHC (MEM-G/2) | 62.2%     | Positive when $\geq 15\%$ of staining.                                                                             | Associated with shorter survival.                                           | 90   |
|               | 102         | IHC (4H84)    | 94.1%     | Negative (-), weak staining (+); moderate staining (++) and strong staining (+++).                                 | HLA-Glow is associated with higher overall and relapse-free survival rates. | 91   |
|               | 73          | HC (MEM-G/1)  | 43.8%     | Positivity when $\geq 25\%$ of staining, irrespective of staining intensity .                                      | Not associated with clinical parameters                                     | 92   |

**Suppl. Table 2. Intertumor HLA-G expression in cancers—cont'd**

| Cancer types  | Sample size | Methods (Ab)  | HLA-G (%) | Immuno-staining evaluation                                                                                                                                   | Main conclusions                                                                          | Ref. |
|---------------|-------------|---------------|-----------|--------------------------------------------------------------------------------------------------------------------------------------------------------------|-------------------------------------------------------------------------------------------|------|
| Breast cancer | 88          | IHC (4H84)    | 25%       | No details described.                                                                                                                                        | Not detected in low-grade ovarian serous carcinomas.                                      | 93   |
|               | 2042        | IHC (4H84)    | 24%       | Any staining of tumor cells considered positive.                                                                                                             | Not associated with clinical outcome.                                                     | 94   |
|               | 81          | IHC (4H84)    | 29%       | Based on presence or absence of positive stained cells.                                                                                                      | HLA-G expressed in majority of the primary tumors but not in associated liver metastasis. | 95   |
|               |             | (MEMG/1)      | 35%       |                                                                                                                                                              |                                                                                           |      |
|               | 201         | (MEM-G/2)     | 19%       |                                                                                                                                                              |                                                                                           |      |
| CRC           | 201         | IHC (HGY)     | 64.6%     | Without staining (-), < 25% and/or weakly (+), 25% ~ 50% and/or moderately (++) and > 50% and/or strongly stained (+++).                                     | An independent prognosis factor.                                                          | 96   |
|               | 102         | IHC (MEM-G/2) | 70.6%     | Based on presence or absence of positive stained cells.                                                                                                      | Associated with worse survival.                                                           | 97   |
|               | 457         | IHC (4H84)    | 70.7%     | HLA-G positive when >5%, irrespective of staining intensity.                                                                                                 | HLA-G expression > 55% associated with worse prognosis.                                   | 98   |
|               | 285         | IHC (4H84)    | 22.1%     | Intensity of staining (absent, weak, moderate or strong ).                                                                                                   | Associated with worse survival and DFS.                                                   | 99   |
|               | 484         | IHC (4H84)    | 27.7%     | Intensity of staining (absent or faint in <20%), weak (faint to weak in >20% but ≤70%), moderate (weak to moderate in >70%) or strong (intense in 20% ~70%). | associated with presence of Foxp3+ cells.                                                 | 100  |

**Suppl. Table 2. Intertumor HLA-G expression in cancers—cont'd**

| Cancer types          | Sample size | Methods (Ab)  | HLA-G (%) | Immuno-staining evaluation                                                                                                                                                                                                          | Main conclusions                                                    | Ref. |
|-----------------------|-------------|---------------|-----------|-------------------------------------------------------------------------------------------------------------------------------------------------------------------------------------------------------------------------------------|---------------------------------------------------------------------|------|
| Cervical cancer       | 58          | IHC (5A6G7)   | 75.86%    | No expression (0), 1% ~30% (1), 31% ~70% (2), 71% ~100% positive cells (3).                                                                                                                                                         | An early marker for lesion progression.                             | 101  |
|                       | 143         | IHC (4H84)    | 60%       | Membrane or combined membrane and cytoplasmic expression of HLA-G were interpreted as positive.                                                                                                                                     | Associated with disease progression.                                | 102  |
|                       | 79          | IHC (5A6G7)   | 31.6%     | Low expression when no signal or discrete staining; high expression when moderate or intense staining.                                                                                                                              | HLA-G detected in 17 (32.7%) without and 8 (29.6%) with metastasis. | 103  |
|                       | 44          | IHC (4H84)    | 55%       | Negative (0), 1%~5% (1), 6%~10% (2), 11%~25% (3), 26%~50% (4) and >50% (5).                                                                                                                                                         | Associated with disease stage.                                      | 104  |
| Endometrial carcinoma | 525         | IHC (4H84)    | 39.8%     | Negative (0); 1%~5% (1); 5%~25% (2); 25%~50% (3); 50%~75% (4) and >75% (5). The intensity scored (0: absent, 1: weak, 2: moderate, 3: strong) . The sum of both scores. A score of $\geq 2.5$ considered as up-regulation of HLA-G. | Not associated with survival.                                       | 105  |
| Esophageal cancer     | 121         | IHC (HGY)     | 90.9%     | Without staining(-); < 25% and weakly (+); 25%~50% and moderately (++); > 50% and strongly stained (+++).                                                                                                                           | An independent prognosis factor.                                    | 106  |
|                       | 79          | IHC (4H84)    | 65.8%     | HLA-G expression was graded as: negative, 1%~25% (1+), 26%~50% (2+), 51%~75% (3+) and >75% (4+),, irrespective of staining intensity.                                                                                               | HLA-G is an independent prognosis factor.                           | 107  |
|                       | 60          | IHC (MEM-G/1) | 70%       | Without staining(0); <25% (1+); 25%~50% (2+); and >50% (3+). Nnegative and 1+ as HLA-G negative, 2+ and 3+ as HLA-G positive.                                                                                                       | Associated with cancer cell differentiation, lymph node metastasis. | 108  |

**Suppl. Table 2. Intertumor HLA-G expression in cancers—cont'd**

| Cancer types             | Sample size  | Methods (Ab)  | HLA-G (%)               | Immuno-staining evaluation                                                                                                               | Main conclusions                                                        | Ref. |
|--------------------------|--------------|---------------|-------------------------|------------------------------------------------------------------------------------------------------------------------------------------|-------------------------------------------------------------------------|------|
| Ewing sarcomas           | 47 (primary) | IHC           | 30%                     | Graded by low, intermediate or strong densities.                                                                                         | Associated with tumor infiltrating T cells.                             | 109  |
|                          | 12 (relapse) | (4H84)        | 33%                     |                                                                                                                                          |                                                                         |      |
| Gastric cancer           | 160          | IHC (HGY)     | 71%                     | Without staining(-); <25% and/or weakly (+);with 25%~50% and/or moderately (++)>50% of the cancer tissues and/or strongly stained (+++). | An independent prognosis factor.                                        | 110  |
|                          | 52           | IHC (5A6G7)   | 31.%                    | HLA-G positivity when >10%.                                                                                                              | An independent prognosis factor.                                        | 111  |
|                          | 179          | IHC (4H84)    | 49.7%                   | Negative; 1%~25% (+); 25%6~50%(++); >50% (+++).                                                                                          | An independent prognosis factor.                                        | 112  |
| Glioblastoma             | 108          | IHC (MEM-G/2) | 60.2%                   | No details described.                                                                                                                    | HLA-G-negative patients were alive longer than HLA-G positive patients. | 113  |
|                          | 173          | IHC (MEM-G/1) | low (43%)<br>high (57%) | The density of HLA-G staining evaluated with computerized image system.                                                                  | Associated with poor survival and increased recurrence;                 | 114  |
| Hepatocellular carcinoma | 36           | WB (MEM-G/1)  | 66.7%                   | No details described.                                                                                                                    | An independent prognosis factor.                                        | 115  |
|                          | 219          | IHC (4H84)    | 50.2%                   | Negative, and positive grouped as 1%~25%, 26%~50%, 51%~75% and >75%.                                                                     | Associated with advanced disease stage.                                 | 49   |
| Lung cancer              | 106          | IHC (HGY)     | 75%                     | Without staining (-);< 25% and weakly (+);25%~50% and moderately (++)>50% and strongly stained (+++).                                    | An independent prognosis factor.                                        | 116  |

**Suppl. Table 2. Intertumor HLA-G expression in cancers—cont'd**

| Cancer types                        | Sample size | Methods (Ab)  | HLA-G (%) | Immuno-staining evaluation                                                                                                                                                        | Main conclusions                                                                        | Ref. |
|-------------------------------------|-------------|---------------|-----------|-----------------------------------------------------------------------------------------------------------------------------------------------------------------------------------|-----------------------------------------------------------------------------------------|------|
| Lung cancer                         | 101         | IHC (4H84)    | 41.6%     | Negative (0), 1%~25% (1), 26%~50% (2) and >50% (3), irrespective of staining intensity.                                                                                           | Associated with advanced disease stage.                                                 | 117  |
|                                     | 131         | IHC (5A6G7)   | 34%       | Negative ≤5% and positive >5%.                                                                                                                                                    | Predominately expressed in adenocarcinoma.                                              | 118  |
| Lymphoma (classical Hodgkin)        | 175         | IHC (MEM-G/1) | 54%       | Positive when > 50% of neoplastic cells showed stronger staining.                                                                                                                 | Associated with absence of MHC class I expression on HRS cells and EBV negative status. | 119  |
| Lymphomas (Diffuse Large B-Cell)    | 20          | IHC (4H84)    | 55%       | Negative staining (0), <25% (1), 26% ~ 50% (2), 51% ~ 75% (3), 76% ~ 100% (4).                                                                                                    | Different patterns of HLA-G expression associated with different outcomes.              | 120  |
| Lymphomas (cutaneous T- and B-cell) | 148         | IHC (4H84)    | 24%       | Positive when >25% of lymphoma cells expressed intermediate/strong staining.                                                                                                      | Negative HLA-G expression associated with worse survival.                               | 121  |
| Nasopharyngeal carcinoma            | 45          | IHC (4H84)    | 51%       | HLA-G positivity as a strong (numerous cells) or as a single-cell positivity (scant, scattered cells throughout the infiltrate).                                                  | Associated with high-grade histology and advanced stage in CTCL.                        | 122  |
| Oral squamous cell carcinoma        | 552         | IHC (4H84)    | 79.2%     | Intensity as (neg), weak (1), moderate (2) or strong (3). Percentage <5% (0); 5%~25% (1); 26%~50% (2); 51%~75% (3); 76%~100% (4). A score by adding intensity and positive cells. | Associated with poor prognosis, recurrence or metastasis.                               | 123  |
|                                     | 60          | IHC (MEM-G/2) | 50%       | An immunoreactive score (IRS) calculated by multiplying the percentage and staining intensity. IRS=0 (negative), <2 ( low), >2 (high).                                            | Lower HLA-G expression associated with longer survival.                                 | 124  |

**Suppl. Table 2. Intertumor HLA-G expression in cancers—cont'd**

| Cancer types              | Sample size | Methods (Ab)               | HLA-G (%)                                   | Immuno-staining evaluation                                                                                              | Main conclusions                                     | Ref. |
|---------------------------|-------------|----------------------------|---------------------------------------------|-------------------------------------------------------------------------------------------------------------------------|------------------------------------------------------|------|
| Ovarian cancer            | 40          | IHC (4H84)                 | low (55%)<br>moderate (20%)<br>strong (25%) | 0% ~ 25% stained tumors and mild staining (1+); 25% ~ 50% and moderately staining (2+); >50% and strongly staining(3+). | HLA-G expression >17% associated with poor survival. | 125  |
|                           | 34          | IHC (MEM-G/2)              | 35%                                         | No details described.                                                                                                   | Associated with high-grade histology.                | 126  |
|                           | 118         | IHC (5A6G7)                | 79.7%                                       | Percentage of stained cells >5% (+), <5% (-).                                                                           | Not associated with clinical parameters.             | 127  |
| Pancreatic adenocarcinoma | 122         | IHC (Rabbit polyclonal Ab) | low (36.1%)<br>high (63.9%)                 | Proportion (0, none; 1, ≤25%; 2, 26%~50%; 3, >50%). Intensity (0, none; 1, weak; 2, moderate; 3, strong).               | An independent prognosis factor.                     | 128  |
|                           | 42          | IHC (4H84)                 | 66%                                         | 1%~25% (negative), 26%~50%, 51%~75% and >75%, irrespective of staining intensity.                                       | Associated with advanced stages                      | 129  |
|                           | 158         | IHC (not described)        | 39.2%                                       | Negative: <5%; local: 5%~75%; diffuse: >75%, irrespective of staining intensity.                                        | Associated with worse survival.                      | 130  |
| Thyroid carcinoma         | 138         | IHC (5A6G7)                | 90.6%                                       | Without staining (-); < 25% (+); 25%~50% (++); and > 50% of cell staining (+++).                                        | Associated with poor prognosis                       | 131  |
|                           | 70          | IHC (MEM-G/2)              | 44.3%                                       | No details described.                                                                                                   | Associated with lymph node metastasis.               | 132  |
